# Supplementary material
Source: publisher figshare collection journal article supplement (https://acs.figshare.com/ndownloader/files/28884762)
Supplement: Supplementary file 1 [file 28884762]

Compound Number	SMILES	IC50 for ENL-H3K9Ac interaction (nM)
1	O=C(C1=CN2C(C=C1)=NN=C2)NCC3=CC=C(SC)C=C3	230 ± 20
2	O=C(C1=CN2C(C=C1)=NN=C2)NCC3=CC=C(CC)C=C3	460 ± 70
3	O=C(C1=CN2C(C=C1)=NN=C2)NC3=CC(C)=C(C)C=C3	480 ± 40
4	O=C(C1=CN2C(C=C1)=NN=C2)NC3=C(F)C=C(F)C=C3	740 ± 60
5	O=C(C1=CN2C(C=C1)=NN=C2)NC3=CC(Cl)=CC=C3	750 ± 60
6	O=C(C1=CN2C(C=C1)=NN=C2)NCC3=CC=C(CN)C=C3	630 ± 40
7	O=C(C1=CN2C(C=C1)=NN=C2)NCC3=CC=C(CN(C)C)C=C3	621 ± 40
8	O=C(C1=CN2C(C=C1)=NN=C2)NCC3=CC=C(CN4CCCCC4)C=C3	636 ± 64
9	O=C(C1=CN2C(C=C1)=NN=C2)NCC3=CC=C(CN4CCOCC4)C=C3	891 ± 91
10	O=C(C1=CN2C(C=C1)=NN=C2)NCC3=CC=C(CN4CCCC4)C=C3	379 ± 27
11	O=C(C1=CN2C(C=C1)=NN=C2)NCC3=CC=C(CN4CCC4)C=C3	51 ± 2.9
12	O=C(NCC1=CC=C(CN2C(C)CC2)C=C1)C(C=C3)=CN4C3=NN=C4	185 ± 10
13	O=C(NCC1=CC=C(CN2C(C(C)C)CC2)C=C1)C(C=C3)=CN4C3=NN=C4	266 ± 13
14	O=C(NCC1=CC=C(CN2C(C(C)(C)C)CC2)C=C1)C(C=C3)=CN4C3=NN=C4	264 ± 21
15	O=C(NCC1=CC(CN2CCC2)=CC=C1)C(C=C3)=CN4C3=NN=C4	202 ± 5.8
16	CC(NC(C(C=C1)=CN2C1=NN=C2)=O)C3=CC=C(CN4CCC4)C=C3	> 1000
17	O=C(C1=CC2=NN=CN2C=C1)NCC3=CC=C(CN4CCC4)C=C3	> 5000
18	O=C(NCC1=CC=C(CN2CCC2)C=C1)C(C=C3)=CN4C3=NC=N4	> 5000
19	O=C(C1=CN2N=C(C=C2N=C1)C)NCC3=CC=C(CN4CCC4)C=C3	> 5000
20	O=C(C1=CN2C(C=C1)=NN=C2)NCC3=CC=C(CC(N)=N)C=C3	2015 ± 92
21	O=C(C1=CN2C(C=C1)=NN=C2)NCC3=CC=C(C)C(CC(N)=N)=C3	2016 ± 120
22	O=C(C1=CN2C(C=C1)=NN=C2)NCC3=CC=C(CC(N)=N)C(F)=C3	1270 ± 39
23	O=C(C1=CN2C(C=C1)=NN=C2)NCC3=CC=C(F)C(CC(N)=N)=C3	1156 ± 57
24	O=C(NCC1=CC=C(CNC2=NC=C(F)C=N2)C=C1)C(C=C3)=CN4C3=NN=C4	85 ± 5.5
25	O=C(NCC1=CC=C(CN([H])C2=NC=C(C(C)C)C=N2)C=C1)C(C=C3)=CN4C3=NN=C4	> 1000
26	O=C(C1=CN2C(C=C1)=NN=C2)NCC3=CC=C(CNC4=NCCN4)C=C3	417 ± 22
27	FC1=CC=C(N([H])CC(C=C2)=CC=C2CNC(C(C=C3)=CN4C3=NN=C4)=O)N=C1	> 5000
28	O=C(NCC1=CC=C(CNC2=NC(F)=CC=C2F)C=C1)C(C=C3)=CN4C3=NN=C4	> 2000
